# Supplementary material for: Promoting Effect of Cu on Pd Applied to the Hydrazine Electro-Oxidation and Direct Hydrazine Fuel Cells
Source: MDPI journal article supplement (doi:10.3390/catal12121639), 2022-12-14
Supplement: s1 [file s1]

Archive with 1 entries (1 files):
- catalysts-2055530-supplementary.pdf
